# Supplementary material
Source: MDPI journal article supplement (https://www.mdpi.com/2073-4441/13/19/2771)
Supplement: s1 [file s1 › water-1366461-supplementary.pdf]

## Supplementary Materials

To the Article “Quantitative Risk Analysis of Urban Flooding Using 1D/ 2D Hydraulic and FME Models” of Kvitsjøen J.; Karlsson D.; Teigene T.; Finsland W.

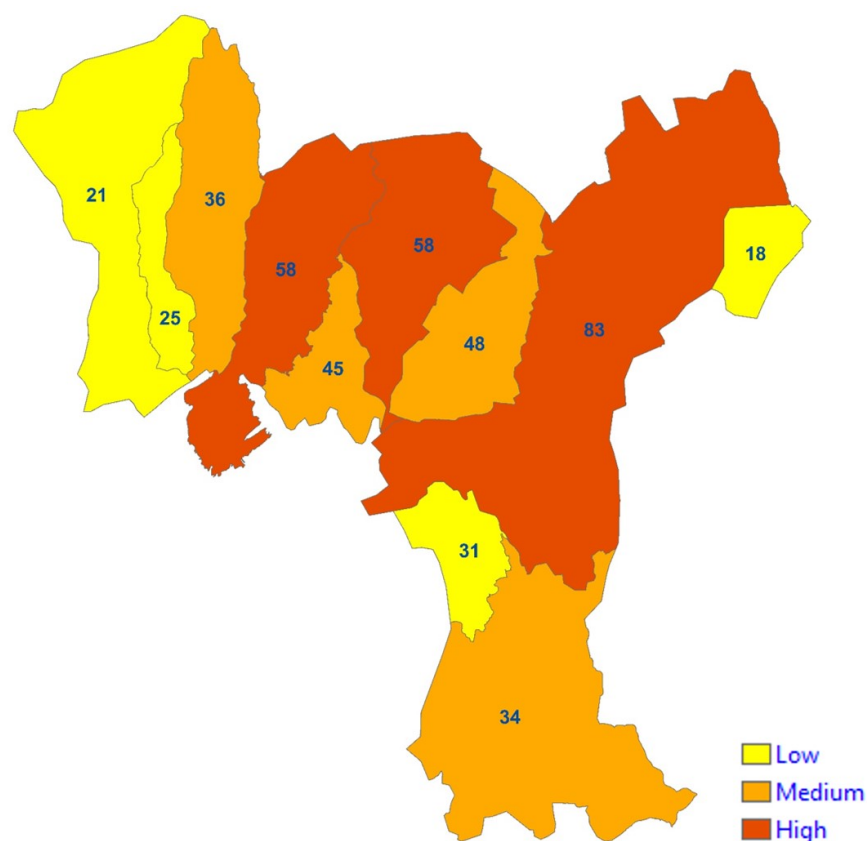

**Figure S1.** Calculated total risk per main catchment in Oslo at CPH.

**Table S1.** Distribution of relative risk per main catchment in Oslo for each risk category (RCD1-RCD6) and total risk at CPH.

| Main catchment  | RCD1 [%] | RCD2 [%] | RCD3 [%] | RCD4 [%] | RCD5 [%] | RCD6 [%] | Total risk [%] |
|-----------------|----------|----------|----------|----------|----------|----------|----------------|
| Lysakerelva     | 45       | 5        | 16       | 21       | 25       | 16       | 21             |
| Mæredalsbekken  | 27       | 8        | 45       | 14       | 17       | 41       | 25             |
| Hoffselva       | 46       | 14       | 37       | 29       | 37       | 54       | 36             |
| Frognerelva     | 51       | 34       | 70       | 62       | 48       | 85       | 58             |
| Bislettbekken   | 36       | 33       | 36       | 61       | 23       | 82       | 45             |
| Akerselva       | 48       | 43       | 54       | 75       | 53       | 73       | 58             |
| Hovinbekken     | 46       | 30       | 46       | 44       | 41       | 83       | 48             |
| Alna            | 92       | 76       | 71       | 97       | 100      | 64       | 83             |
| Ellingselva     | 28       | 3        | 7        | 13       | 17       | 41       | 18             |
| Ljanselva Fjord | 39       | 6        | 40       | 20       | 31       | 50       | 31             |
| Ljanselva       | 52       | 12       | 26       | 36       | 44       | 32       | 34             |

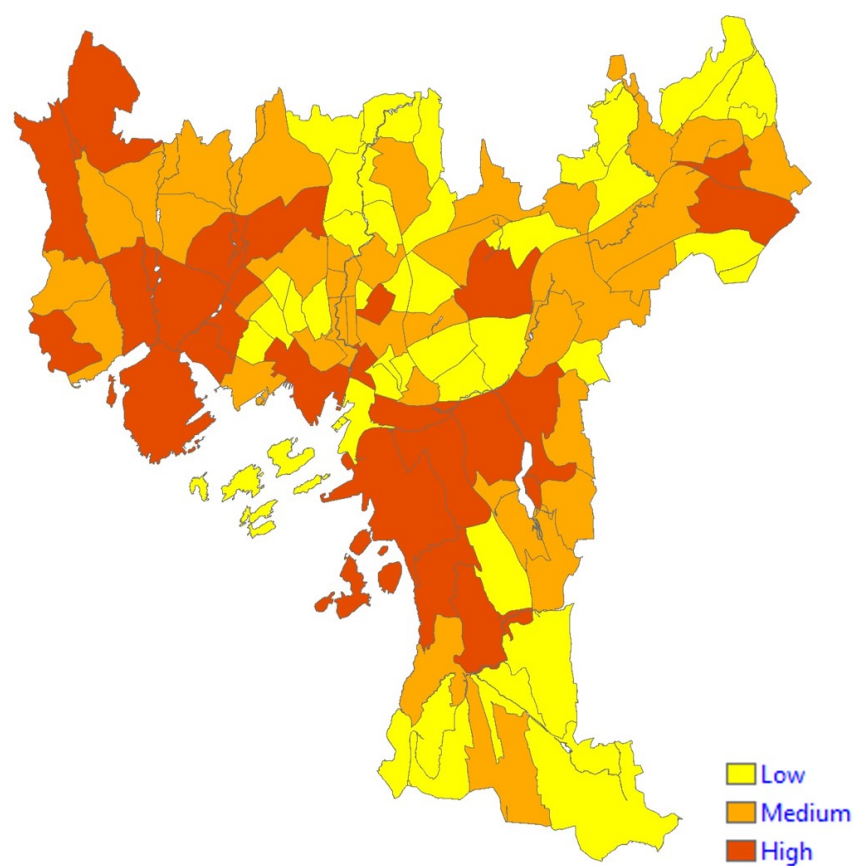

**Figure S1.** Calculated total risk per administrative district in Oslo at CPH.

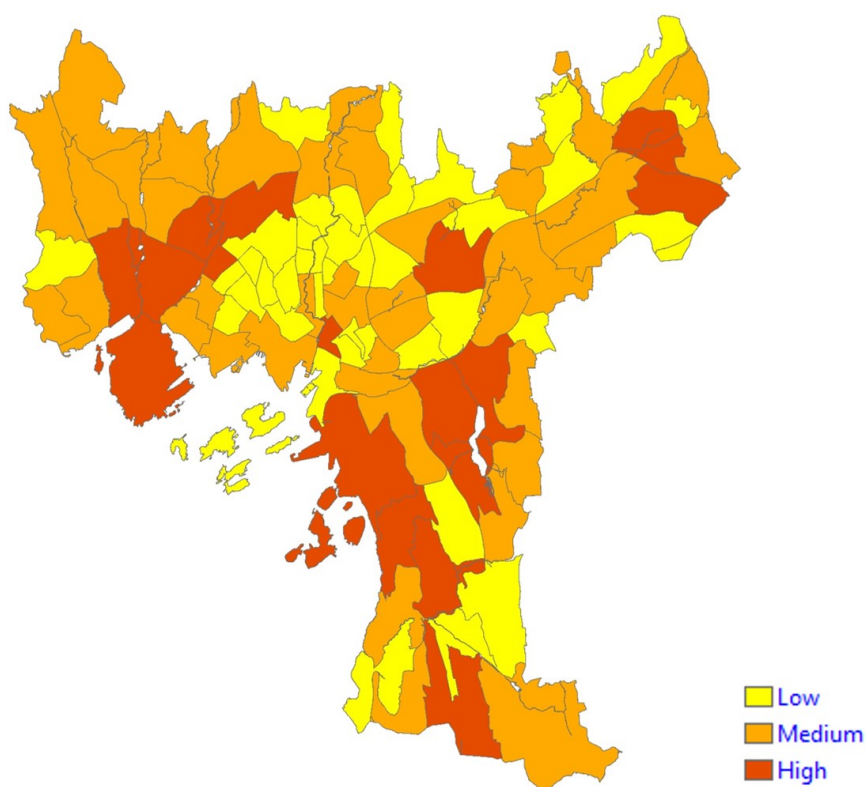

**Figure S2.** Calculated relative consequence for risk category "Human life and health" (RCD1) per administrative district in Oslo at CPH.

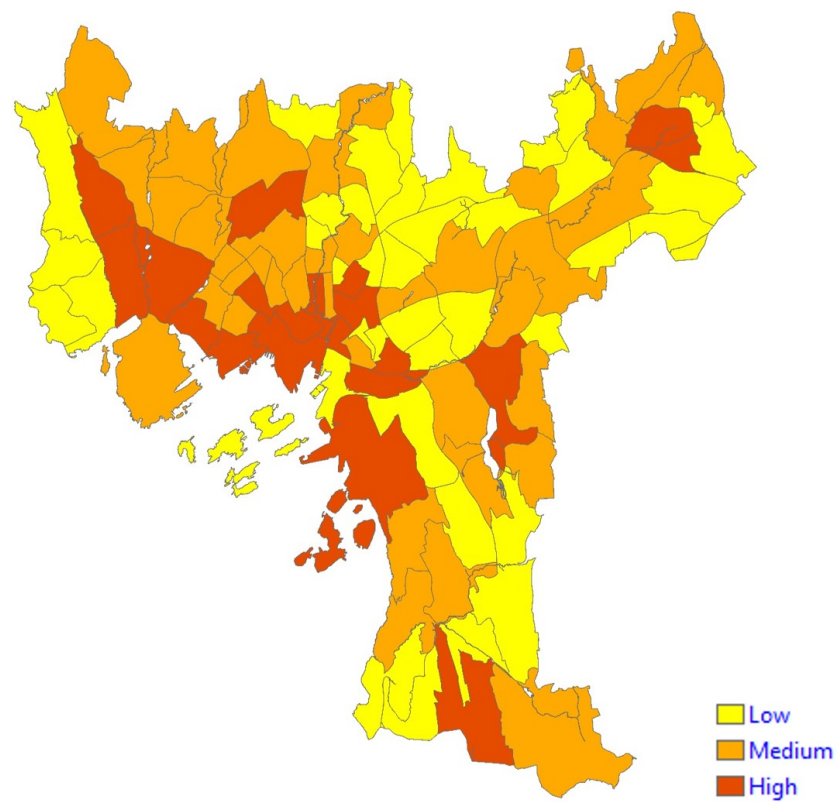

**Figure S3.** Calculated relative consequence for risk category "Nature and environment" (RCD2) per administrative district in Oslo at CPH.

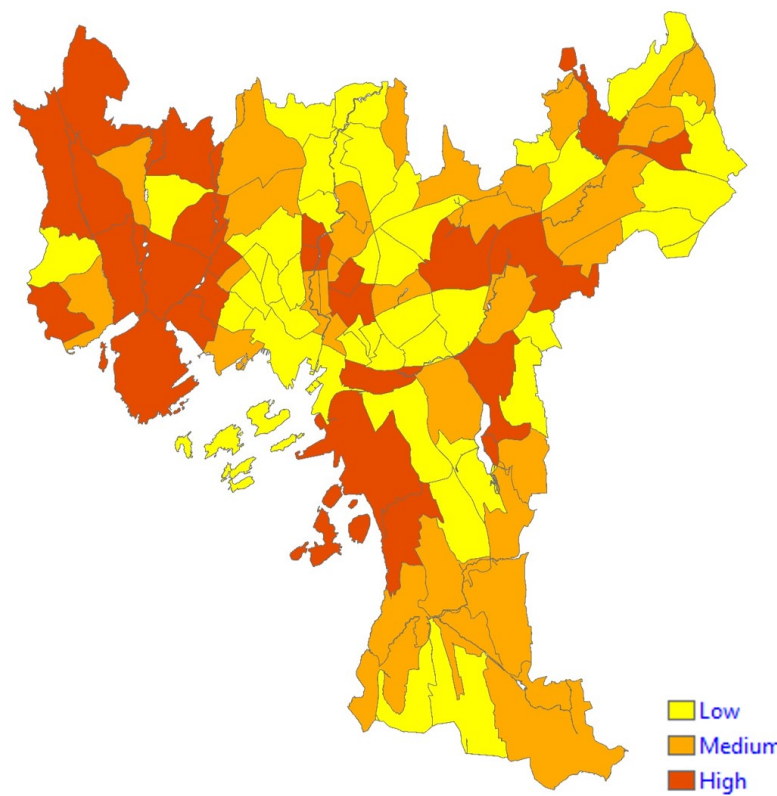

**Figure S4.** Calculated relative consequence for risk category "Critical infrastructure" (RCD3) per administrative district in Oslo at CPH.

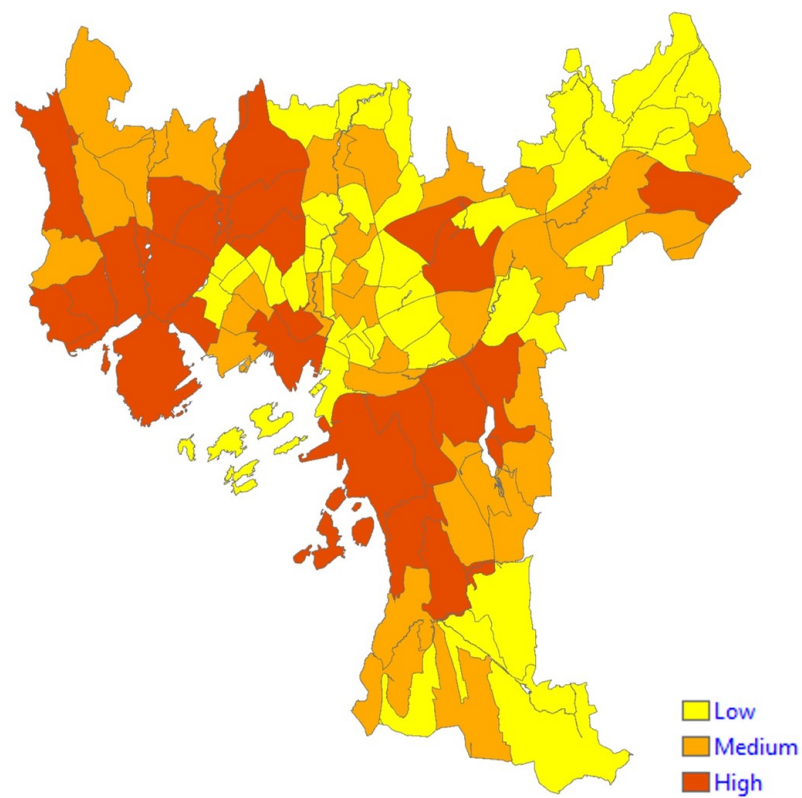

**Figure S5.** Calculated relative consequence for risk category "Vulnerable social functions" (RCD4) per administrative district in Oslo at CPH.

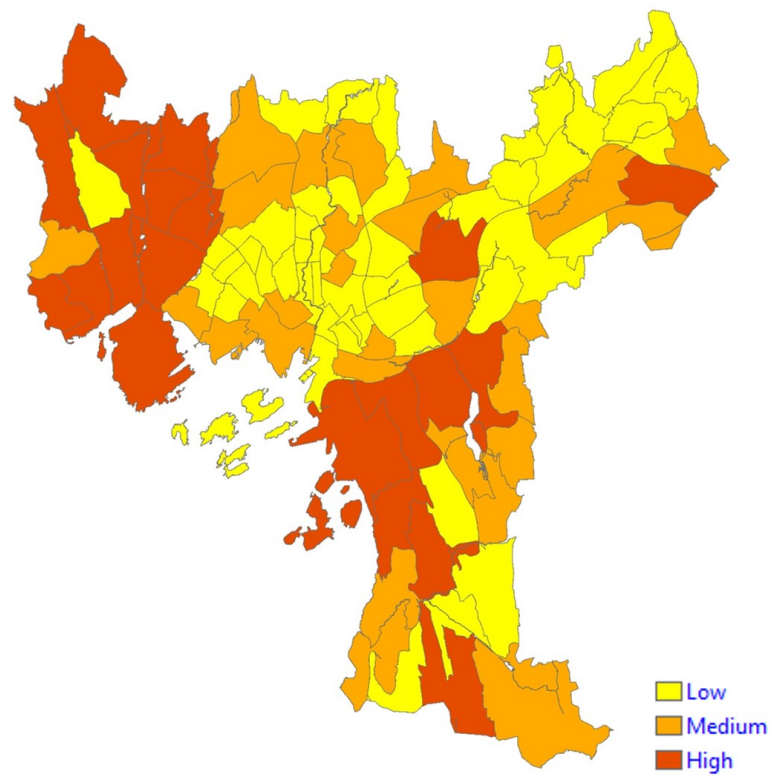

**Figure S6.** Calculated relative consequence for risk category "Building damage" (RCD5) per administrative district in Oslo at CPH.

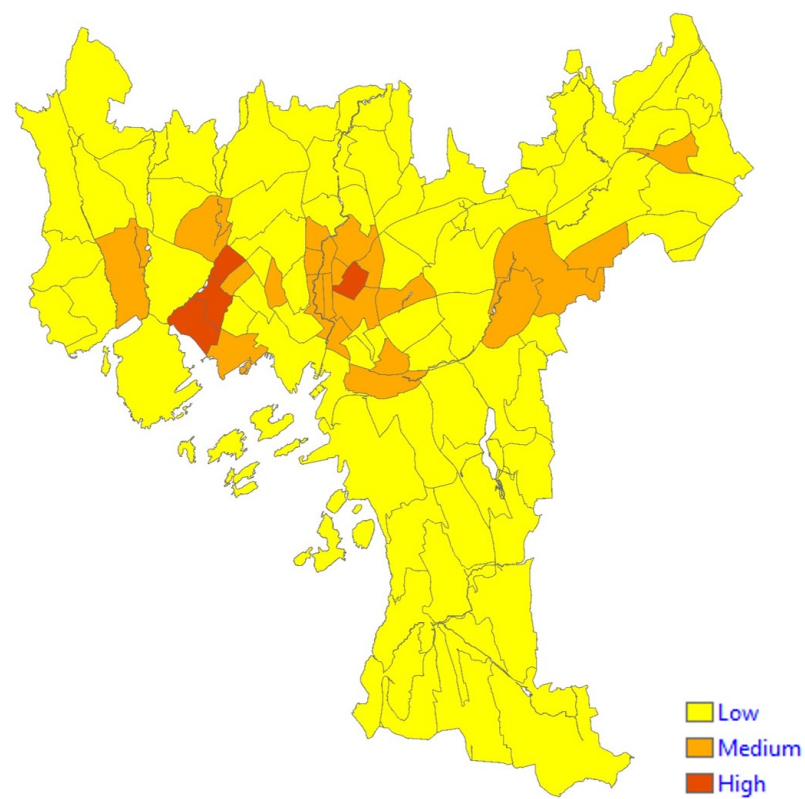

**Figure S7.** Calculated relative consequence for risk category “Accessibility” (RCD6) per administrative district in Oslo at CPH.

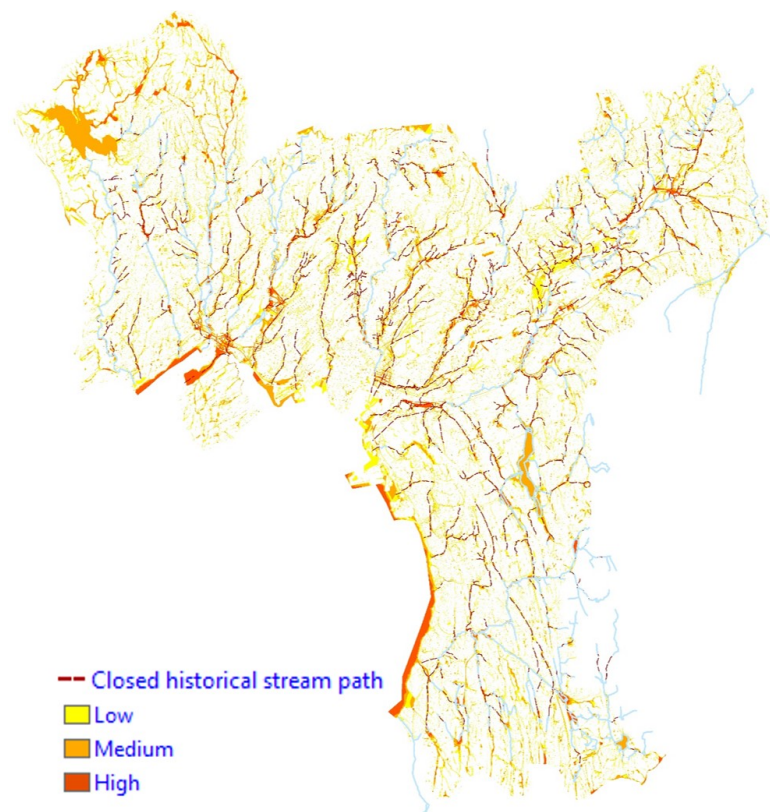

**Figure S8.** Distribution of risk type “Drowning and instability of humans” along closed historical stream path in Oslo at CPH.

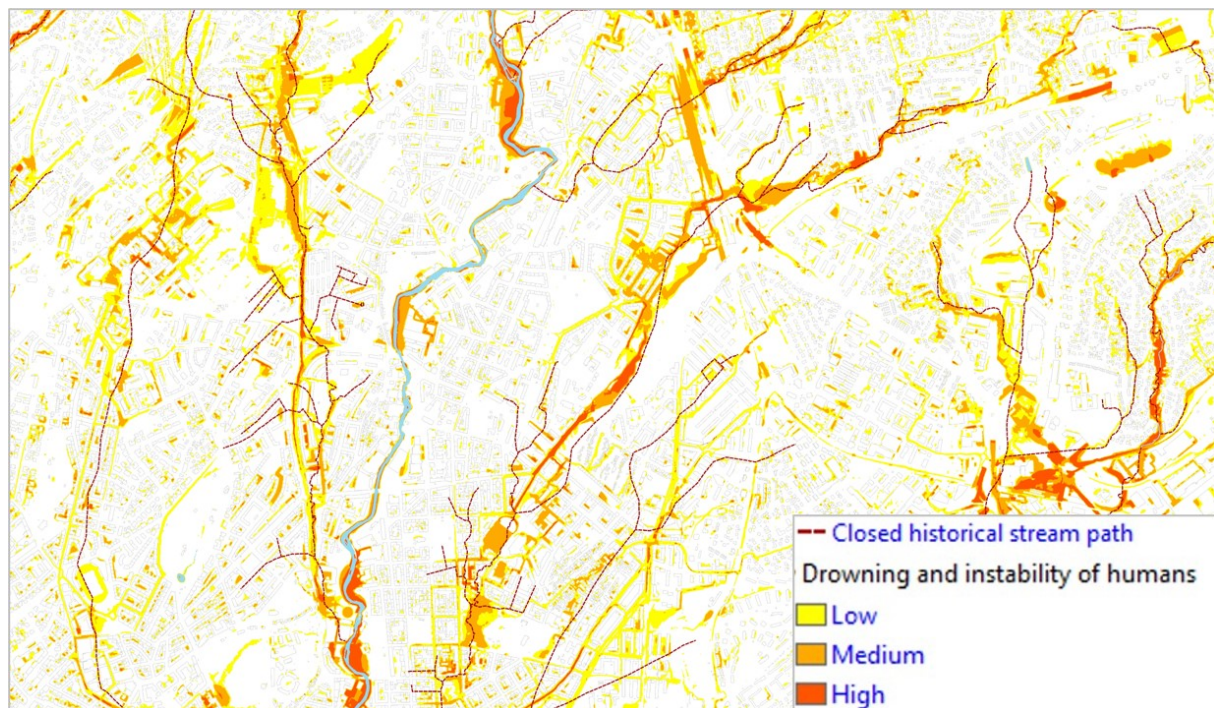

**Figure S9.** Distribution of risk type “Drowning and instability of humans” along closed historical stream path in Oslo at CPH.

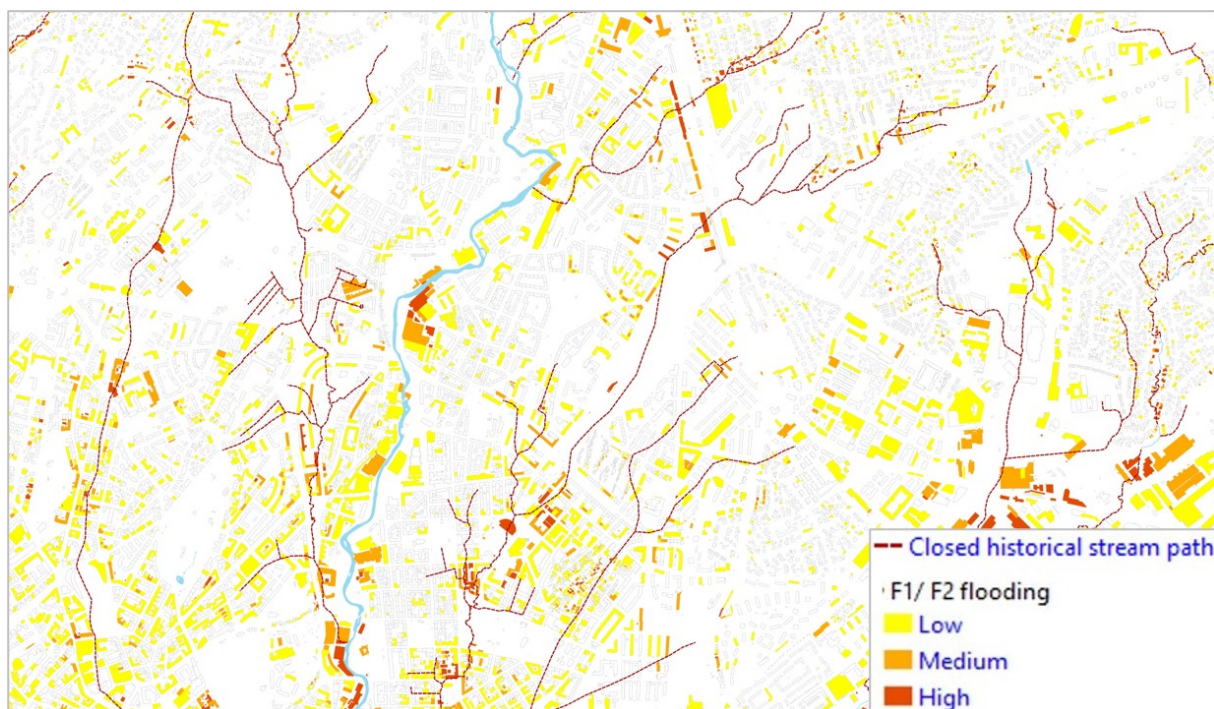

**Figure S10.** Distribution of risk type “Flooding” along closed historical stream path in Oslo at CPH.

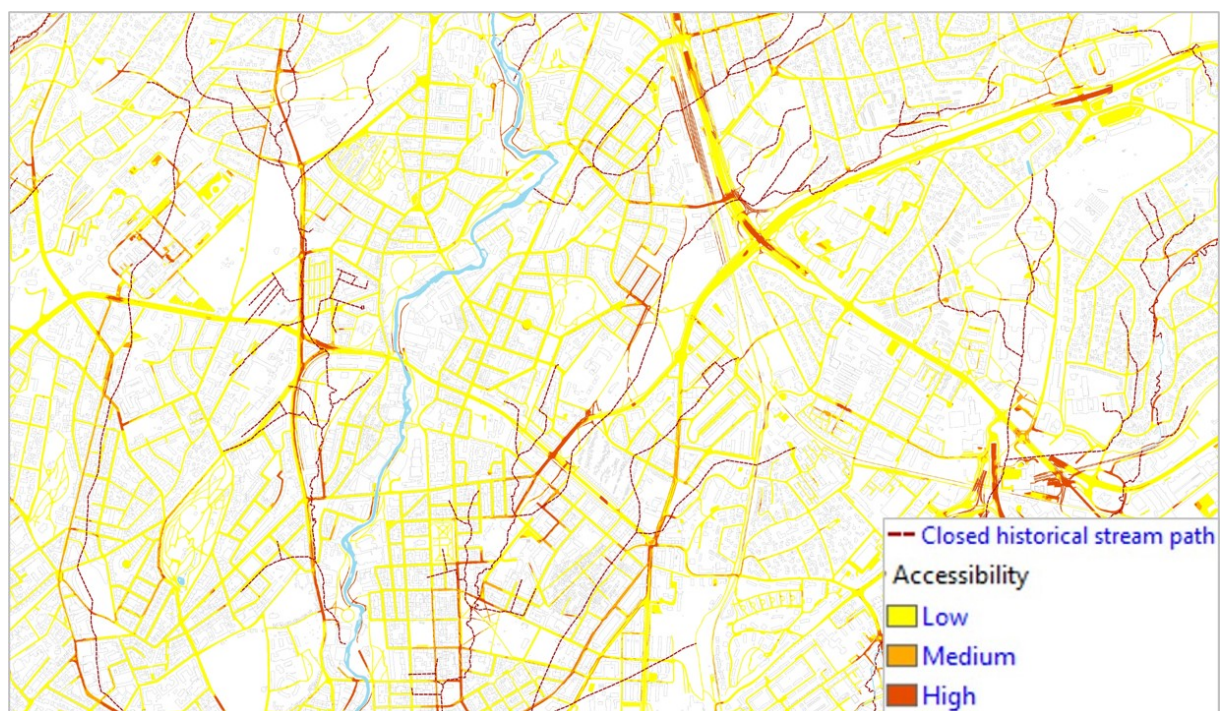

**Figure S11.** Distribution of risk type “Traffic jam” along closed historical stream path in Oslo at CPH.

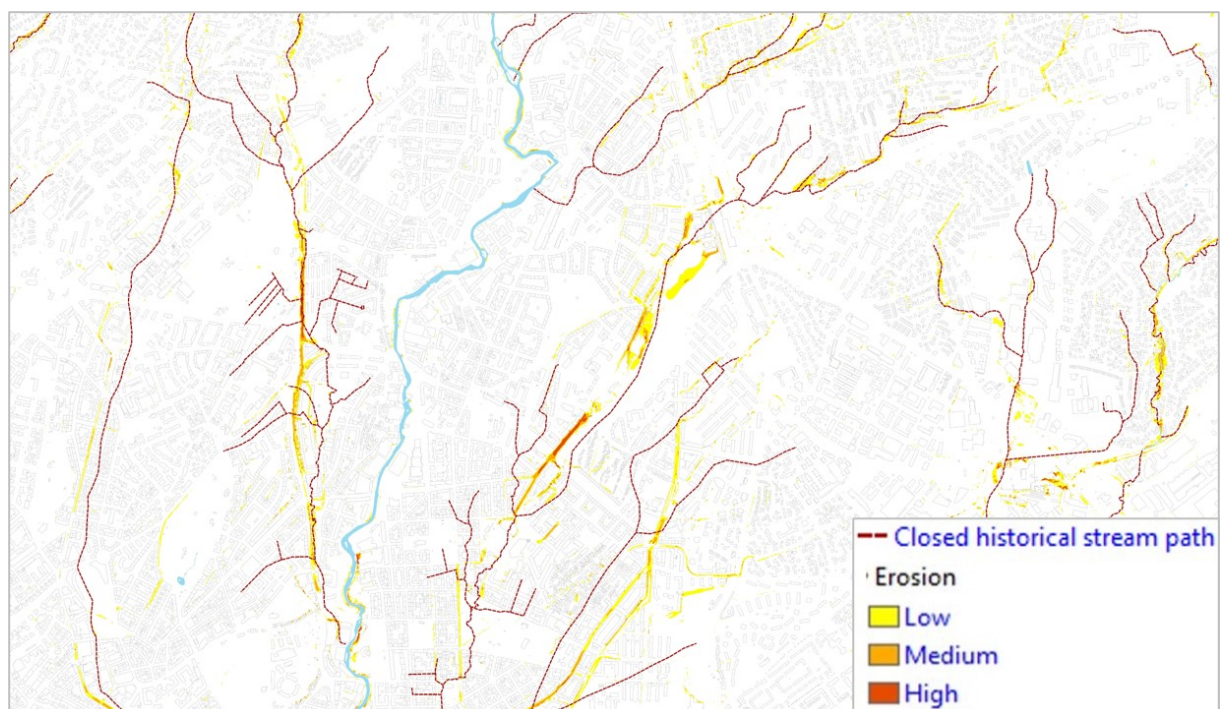

**Figure S12.** Distribution of risk type “Erosion” along closed historical stream path in Oslo at CPH.

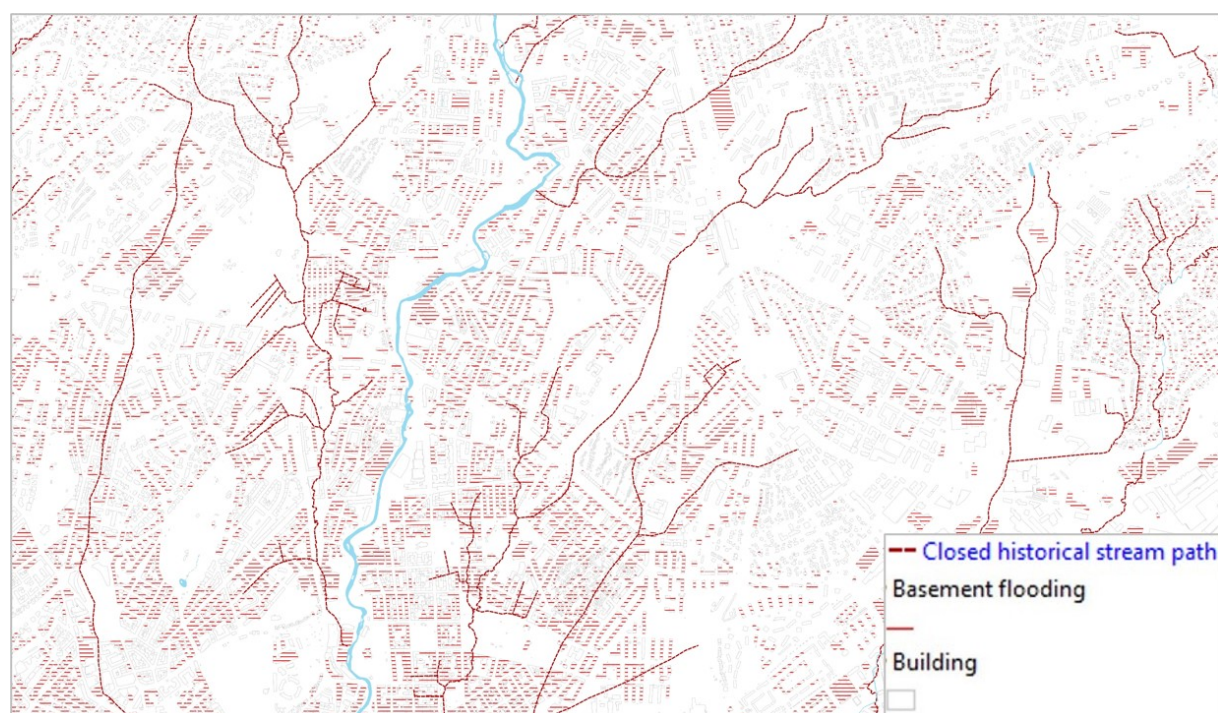

**Figure S13.** Distribution of risk type “Basement flooding” along closed historical stream path in Oslo at CPH.
